# Supplementary material for: Fabrication and application of graphene oxide modified cyclodextrin chiral separation membranes
Source: Royal Society of Chemistry journal article supplement (doi:10.1039/d3nj01309j), 2023-01-01
Supplement: d3nj01309j1.pdf [file d3nj01309j1.pdf]

## Supporting Information

### **Fabrication and Application of Graphene Oxide Modified Cyclodextrin Chiral Separation Membrane**

Yining Zhu, Xinmu Li, Zhaoye Bai, Yujia Zeng, Han Jiang, Xiaoping Bai, Ruijun  
Li\*

Department of Analytical Chemistry, China Pharmaceutical University, Nanjing  
210009, China

Corresponding authors at: Department of Analytical Chemistry, China Pharmaceutical  
University, 24 TongJiaXiang, Nanjing, Jiangsu 210009, China.

E-mail addresses: [ccjlrj@cpu.edu.cn](mailto:ccjlrj@cpu.edu.cn).

### HPLC analysis conditions for tryptophan

Column: C18 column (150×4.6 mm, 5 μm)

Mobile phase: aqueous solution (0.375 mmol L<sup>-1</sup> L-phenylalanine and 0.075 mmol L<sup>-1</sup>

copper sulfate): methanol = 80: 20 (V/V)

Flow rate: 1.0 mL min<sup>-1</sup>

Column temperature: 35 °C

UV detection wavelength: 278 nm

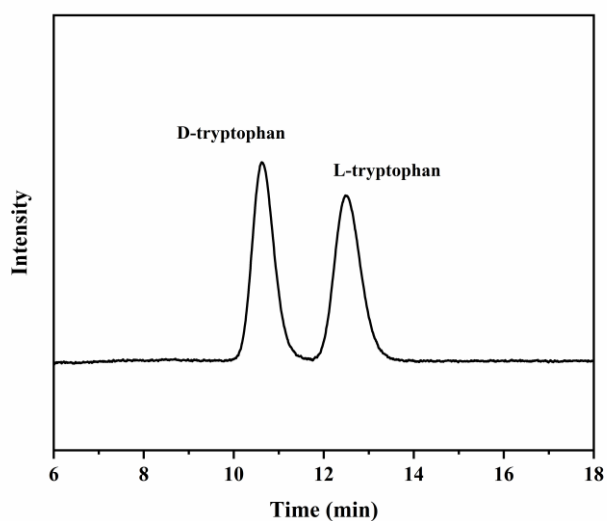

**Fig. S1.** The HPLC chromatogram of the enantioseparation for tryptophan

## HPLC analysis conditions for propranolol [1]

Column: AGP column (150×4.0 mm, 5 μm)

Mobile phase: sodium acetate buffer (20 mmol/L, pH 4.5): methanol = 92: 8 (V/V)

Flow rate: 0.8 mL min<sup>-1</sup>

Column temperature: 25 °C

UV detection wavelength: 220 nm

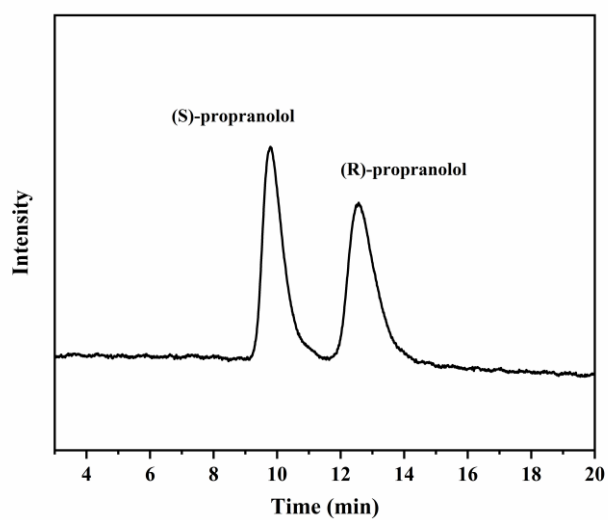

**Fig. S2.** The HPLC chromatogram of the enantioseparation for propranolol

### HPLC analysis conditions for warfarin [2]

Column: AGP column (150×4.0 mm, 5 μm)

Mobile phase: phosphate buffer (10 mmol L<sup>-1</sup>, pH 7.0): acetonitrile= 90:10 (V/V)

Flow rate: 0.8 mL min<sup>-1</sup>

Column temperature: 28 °C

UV detection wavelength: 310 nm

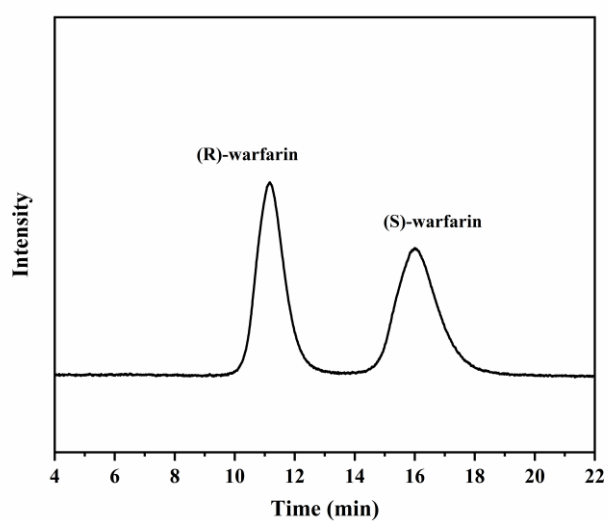

**Fig. S3.** The HPLC chromatogram of the enantioseparation for warfarin

### HPLC analysis conditions for metoprolol [3]

Column: AGP column (150×4.0 mm, 5 μm)

Mobile phase: phosphate buffer (10 mmol L<sup>-1</sup>, pH 7.0): methanol = 94:6 (V/V)

Flow rate: 0.8 mL min<sup>-1</sup>

Column temperature: 25 °C

UV detection wavelength: 220 nm

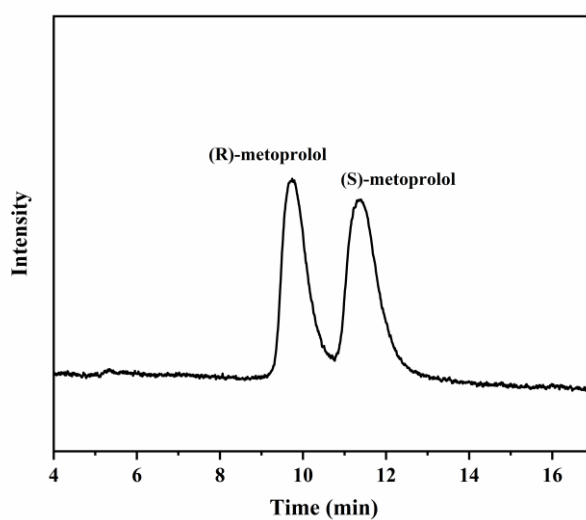

**Fig. S4.** The HPLC chromatogram of the enantioseparation for metoprolol

## References

- [1] H. Luo, X. Bai, H. Liu, X. Qiu, J. Chen and Y. Ji, *Sep. Purif. Technol.*, 2021, **285**, 120336.
- [2] A. Shibukawa, M. Nagao, Y. Kuroda and T. Nakagawa, *Anal. Chem.*, 1990, **62**, 712-716.
- [3] B.A. Persson, K. Balmer, P.O. Lagerstrom and G. Schill, *J. Chromatogr A.*, 1990, **500**, 629-36.
